# Supplementary material
Source: MDPI journal article supplement (https://www.mdpi.com/1996-1073/15/7/2688)
Supplement: s1 [file s1]

# Deeper Understanding of Ternary Eutectic Carbonates/Ceria-based Oxide Composite Electrolyte through Thermal Cycling

## -SUPPLEMENTARY INFORMATION-

André Grishin<sup>1,2</sup>, Manel Ben Osman<sup>1</sup>, Haïtam Meskine<sup>1</sup>, Valérie Albin<sup>1</sup>, Virginie Lair<sup>1</sup>,  
Michel Cassir<sup>1</sup>, Armelle Ringuedé<sup>1,\*</sup>

<sup>1</sup> Chimie ParisTech, PSL University, CNRS, Institut de Recherche de Chimie Paris, Paris, F-75005, 11 rue Pierre et Marie Curie, France

<sup>2</sup> TotalEnergies One Tech, 2 place Jean Millier, 92400 Courbevoie, France

corresponding author \* Armelle.Ringuede@chimieparistech.psl.eu

### 1. Chromatographic analysis of the outlet gas mixture during EIS thermal cycling analysis

To perform the output gas analysis during a thermal cycling of composite electrolyte SDC-LiNaK under MCFC standard reducing atmosphere a GC Trace 1310<sup>TM</sup> (Thermo Fisher Scientific) was used according to the scheme and protocol established by Meskine *et al.* [1]. A two column setup with a Thermal Conductivity Detector (TCD) was adopted to perform a separation of gases. The results are presented in figure S1 as a spectrum of electrical signal as function of retention times at two different temperatures. The retention time values for detected gases are summarized in Table S1.

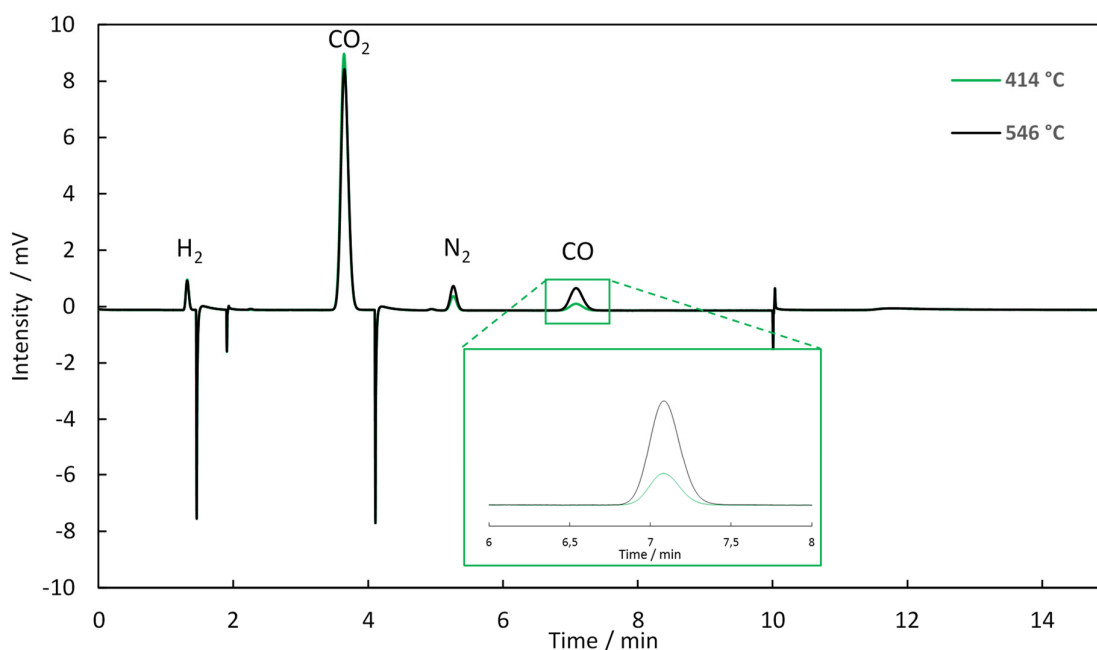

Figure S1. Outlet composition of gas mixture during EIS thermal cycling analysis of SDC-

LiNaK under MCFC standard reducing conditions at 441°C and 546°C.

**Table S1. Retention times of gases forming an outlet mixture during EIS thermal cycling analysis of SDC-LiNaK under MCFC standard reducing conditions.**

| Gas                  | H <sub>2</sub> | CO <sub>2</sub> | N <sub>2</sub> | CO  |
|----------------------|----------------|-----------------|----------------|-----|
| Retention time (min) | 1.3            | 3.5             | 5.2            | 7.2 |

## 2. Activation energy values calculated from Arrhenius plots within different temperature regions

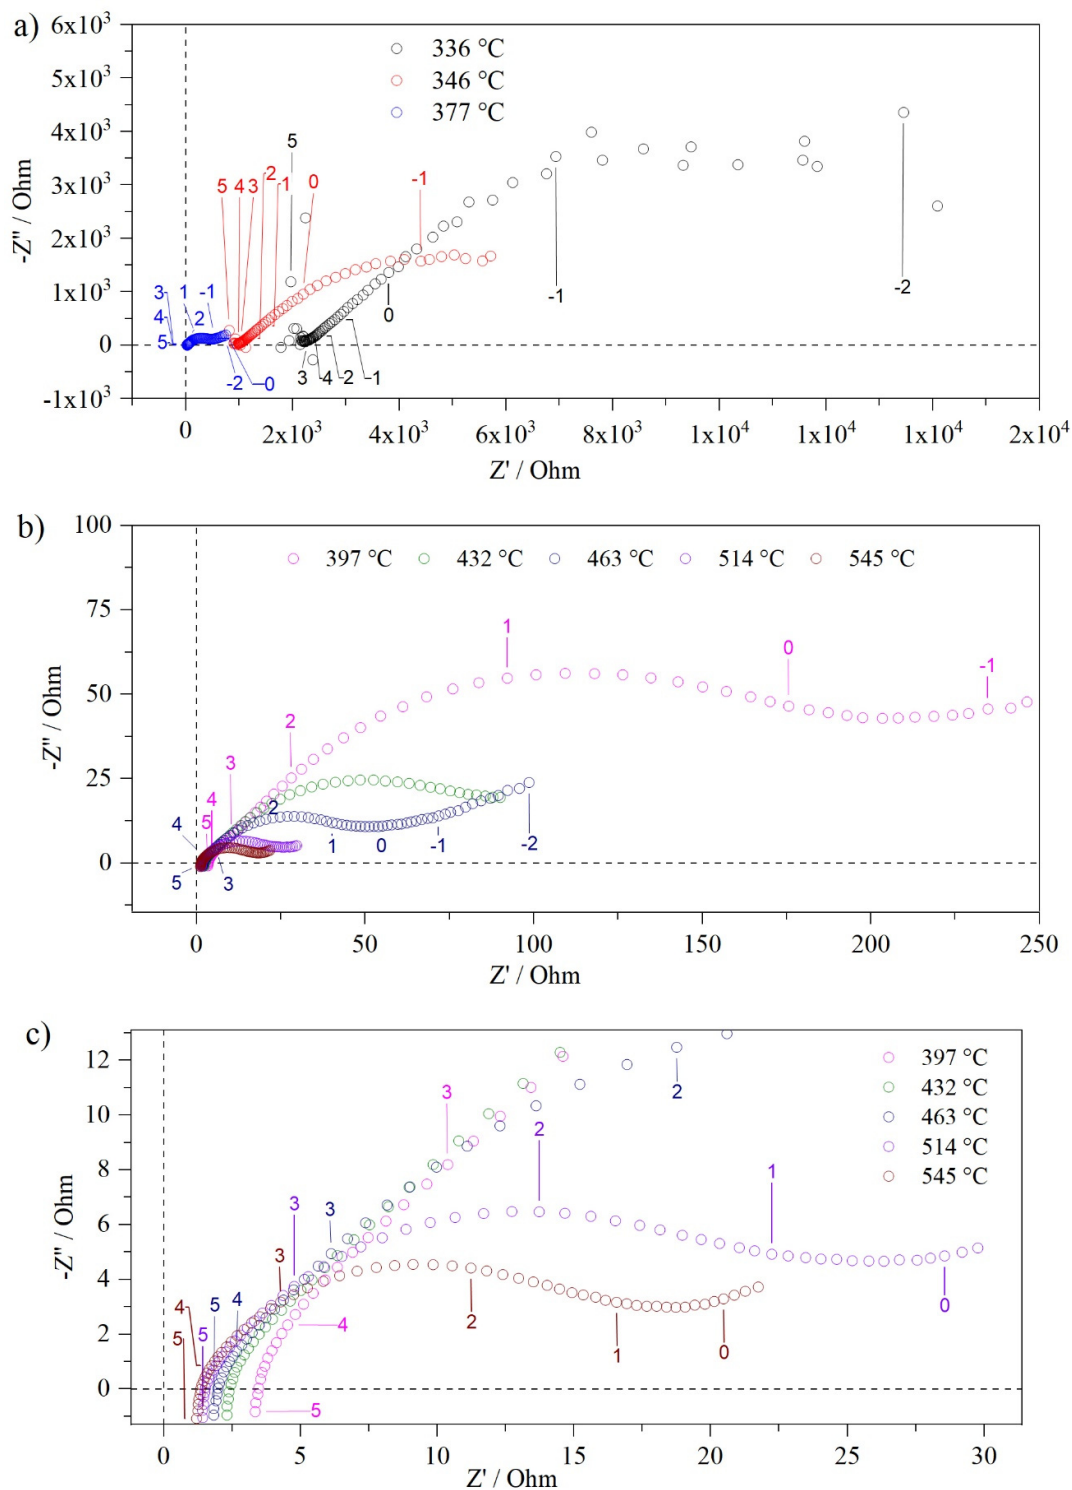

Figure S2. Nyquist EIS plots recorded in nitrogen atmosphere at different temperatures within the symmetric Au | SDC-LiNaK | Au electrochemical configuration. The amplitude of the applied sinusoidal voltage was  $V_0 = 100$  mV. The numbers on the diagrams indicate the logarithm of the frequency of the applied signal.

**Table S2. Activation energy ( $E_a$ ) and transition temperature ( $t_t$ ) values calculated from Arrhenius plot during thermal cycling of SDC-LiNaK under dry reducing atmospheres containing different amounts of hydrogen. H – heating; C – cooling; LT and HT – low and high temperature regions respectively.**

| Cycle | N <sub>2</sub> 100 vol.%                          |                          |                     | Cycle     | H <sub>2</sub> / N <sub>2</sub> : (23 / 77) vol.% |                          |                     |
|-------|---------------------------------------------------|--------------------------|---------------------|-----------|---------------------------------------------------|--------------------------|---------------------|
|       | E <sub>a</sub> , eV (LT)                          | E <sub>a</sub> , eV (HT) | t <sub>i</sub> , °C |           | E <sub>a</sub> , eV (LT)                          | E <sub>a</sub> , eV (HT) | t <sub>i</sub> , °C |
| H1    | 2.08±0.06                                         | 0.27±0.02                | 367<br>395          | H1        | 1.58±0.05                                         | 0.21±0.01                | 353<br>406          |
| C1    |                                                   |                          |                     | 1.02±0.03 | 0.12±0.01                                         | 406                      |                     |
|       |                                                   |                          |                     |           | 0.49±0.02                                         | 361                      |                     |
|       |                                                   |                          |                     |           | 1.21±0.04                                         | 315<br>307               |                     |
| H2    |                                                   |                          |                     | 0.93±0.03 | 1.32±0.04                                         | 300                      |                     |
|       |                                                   |                          |                     |           | 0.17±0.01                                         | 335<br>397               |                     |
| C2    |                                                   |                          |                     | 0.73±0.02 | 0.14±0.01                                         | 407                      |                     |
|       |                                                   |                          |                     |           | 0.43±0.04                                         | 361<br>316               |                     |
|       |                                                   |                          |                     |           | 1.53±0.07                                         | 307                      |                     |
| Cycle | H <sub>2</sub> / N <sub>2</sub> : (50 / 50) vol.% |                          |                     | Cycle     | H <sub>2</sub> 100 vol.%                          |                          |                     |
|       | E <sub>a</sub> , eV (LT)                          | E <sub>a</sub> , eV (HT) | t <sub>i</sub> , °C |           | E <sub>a</sub> , eV (LT)                          | E <sub>a</sub> , eV (HT) | t <sub>i</sub> , °C |
| H1    | 1.63±0.03                                         | 0.21±0.01                | 357<br>397          | H1        | 1.66±0.02                                         | 0.28±0.01                | 359<br>398          |
| C1    | 0.81±0.02                                         | 0.13±0.01                | 406                 | C1        | 0.85±0.02                                         | 0.16±0.01                | 413                 |
|       |                                                   | 0.39±0.02                | 397                 |           |                                                   | 0.42±0.02                | 345                 |
|       |                                                   | 1.35±0.05                | 310<br>297          |           |                                                   | 1.20±0.02                | 308<br>295          |
| H2    | 0.84±0.01                                         | 1.43±0.05                | 305                 | H2        | 0.85±0.02                                         | 1.20±0.02                | 296                 |
|       |                                                   | 0.24±0.01                | 324                 |           |                                                   | 0.31±0.02                | 310                 |
|       |                                                   | 0.12±0.01                | 386<br>442          |           |                                                   | 0.18±0.01                | 366<br>420          |
| C2    | 0.75±0.03                                         | 0.13±0.01                | 394                 | C2        | 0.75±0.01                                         | 0.16±0.01                | 394                 |
|       |                                                   | 0.41±0.01                | 362                 |           |                                                   | 0.45±0.02                | 318                 |
|       |                                                   | 1.23±0.04                | 309<br>294          |           |                                                   | 1.09±0.07                | 305<br>291          |

**Table S3. Activation energy ( $E_a$ ) and transition temperature ( $t_i$ ) values calculated from Arrhenius plot during thermal cycling of SDC-LiNaK under oxidizing and reducing atmospheres both containing 20% of moisture. H – heating; C – cooling; LT and HT – low and high temperature regions respectively.**

| Cycle | N <sub>2</sub> / O <sub>2</sub> : (80 / 20) vol.% hum. 20% |                          |                     | Cycle | N <sub>2</sub> / H <sub>2</sub> : (77 / 33) vol.% hum. 20% |                          |                     |
|-------|------------------------------------------------------------|--------------------------|---------------------|-------|------------------------------------------------------------|--------------------------|---------------------|
|       | E <sub>a</sub> , eV (LT)                                   | E <sub>a</sub> , eV (HT) | t <sub>i</sub> , °C |       | E <sub>a</sub> , eV (LT)                                   | E <sub>a</sub> , eV (HT) | t <sub>i</sub> , °C |
| H1    | 1.62±0.02                                                  | 0.24±0.01                | 353<br>396          | H1    | 1.61±0.03                                                  | 0.19±0.01                | 362<br>407          |
| C1    | 1.95±0.07                                                  | 0.22±0.01                | 403                 | C1    | 2.07±0.17                                                  | 0.12±0.01                | 395                 |
|       |                                                            | 0.55±0.22                | 369                 |       |                                                            | 0.37±0.01                | 343                 |
|       |                                                            | 1.39±0.03                | 314<br>286          |       |                                                            | 1.10±0.02                | 288<br>270          |
| H2    | 1.75±0.06                                                  | 1.60±0.02                | 295                 | H2    | 1.72±0.07                                                  | 1.06±0.02                | 275                 |
|       |                                                            | 0.22±0.01                | 325                 |       |                                                            | 0.27±0.01                | 298                 |
|       |                                                            |                          | 392                 |       |                                                            | 0.14±0.01                | 360<br>407          |
| C2    | 2.13±0.12                                                  | 0.24±0.02                | 407                 | C2    | 2.10±0.09                                                  | 0.14±0.01                | 386                 |
|       |                                                            | 0.55±0.02                | 379                 |       |                                                            | 0.39±0.01                | 342                 |
|       |                                                            | 1.71±0.03                | 302<br>279          |       |                                                            | 1.06±0.01                | 292<br>277          |

**Table S4. Activation energy ( $E_a$ ) and transition temperature ( $t_i$ ) values calculated from Arrhenius plot during thermal cycling of SDC-LiNaK under MCFC standard oxidizing and reducing atmospheres. H – heating; C – cooling; LT and HT – low and high temperature regions respectively.**

| Cycle | N <sub>2</sub> / O <sub>2</sub> / CO <sub>2</sub> : (56 / 14 / 30) vol.% |                          |                     | Cycle | H <sub>2</sub> / CO <sub>2</sub> / H <sub>2</sub> O : (64 / 16 / 20) vol.% |                          |                     |
|-------|--------------------------------------------------------------------------|--------------------------|---------------------|-------|----------------------------------------------------------------------------|--------------------------|---------------------|
|       | E <sub>a</sub> , eV (LT)                                                 | E <sub>a</sub> , eV (HT) | t <sub>i</sub> , °C |       | E <sub>a</sub> , eV (LT)                                                   | E <sub>a</sub> , eV (HT) | t <sub>i</sub> , °C |
| H1    | 1.65±0.05                                                                | 0.31±0.01                | 354<br>407          | H1    | 1.17±0.03                                                                  | 0.17±0.01                | 347<br>403          |
| C1    | 1.97±0.03                                                                | 0.33±0.01                | 396<br>352          | C1    | 1.51±0.04                                                                  | 0.31±0.01                | 404<br>357          |
| H2    | 1.95±0.03                                                                | 0.26±0.01                | 356<br>407          | H2    | 1.69±0.05                                                                  | 0.23±0.02                | 377<br>412          |
| C2    | 2.05±0.03                                                                | 0.27±0.02                | 400<br>344          | C2    | 2.06±0.08                                                                  | 0.44±0.01                | 408<br>367          |

## Reference

1. Meskine, H.; Gürbüz, E.; Albin, V.; Meléndez-Ceballos, A.; Cassir, M.; Ringuedé, A.; Lair, V. CO<sub>2</sub> Electrolysis in a Reversible Molten Carbonate Fuel Cell: Online Chromatographic Detection of CO. *Int. J. Hydrogen Energy* **2021**, *46*, 14913–14921, doi:10.1016/J.IJHYDENE.2020.08.028.
